# Supplementary material
Source: PubMed Central journal article supplement (PMC3607013)
Supplement: 1214887110_pnas.201214887SI.pdf [file 1214887110_pnas.201214887SI.pdf]

# Supporting Information

Bin et al. 10.1073/pnas.1214887110

## SI Materials and Methods

**Construction of Munc18-1 and Munc18-2 KD and Expression Plasmids.** For Munc18-1 knockdown (KD) in RBL-2H3 cells, parental pLKO-puro plasmid (Sigma-Aldrich) was modified: U6 promoter was replaced by H1 promoter + 19-nucleotide shRNA sequences of pSuper-Munc18-1 KD (1), creating pLKO-H1-Munc18-1-puro. The Munc18-2 KD plasmid was previously described (1). Expression plasmids were created by modifying the parental pLVX-IRES-puro (Clontech Laboratories). First, the puromycin-resistance gene was replaced by a blasticidin-resistance gene, creating pLVX-IRES-blast (2). Then, Emerald GFP (EmGFP; Clontech Laboratories) or the myc sequence were subcloned into the BamHI site, generating pLVX-EmGFP-IRES-blast and pLVX-myc-IRES-blast, respectively. cDNA of rat Munc18-1 and Munc18-2 (kind gifts from Thomas C. Südhof, Stanford University School of Medicine) were mutated to create silent nucleotide mutations (SNMs) for Munc18-1, see ref. 1; for Munc18-2, AGGAATTACGATCGTCGAGGA, with the underline indicating SNM) within the shRNA-targeted sequences to protect the exogenously expressed gene from being degraded by anti-Munc18-1 or anti-Munc18-2 shRNA. We found that our original pCMV5-rMunc18-2 WT cDNA had two point mutations (G11V and T304R), which were corrected by site-directed mutagenesis. Point mutations (F115E, E132A, and F115E/E132A) were also made using site-directed mutagenesis. Munc18-1 insert (WT and mutants) was digested from pCMV5-rMunc18-EmGFP with EcoRI/XbaI and was subcloned into the same sites of pLVX-EmGFP-IRES-blast, pLVX-myc-IRES-blast, or pLVX-IRES-blast. Munc18-2 insert (WT and mutants) digested from pCMV5-rMunc18-2 (without stop codon) with EcoRI/XbaI was subcloned into the same site of pLVX-EmGFP-IRES-blast. Sequences of all created plasmids were verified by DNA sequencing. KD and expression plasmids were cotransfected with psPAX2 and pMD.G into human embryonic kidney (HEK)-293FT cells for generating recombinant lentivirus.

**Isolation of Stable Munc18-1/2 KD and Rescued PC12 and RBL-2H3 Cells.** Munc18-1/2 double KD (DKD) pheochromocytoma (PC) 12 cells were maintained in DMEM (Invitrogen) containing 5% (vol/vol) calf serum, 5% (vol/vol) horse serum (both from HyClone Laboratories), penicillin (100 U/mL)/streptomycin (0.1 mg/mL) (Sigma-Aldrich), 250 ng/mL amphotericin B (Sigma-Aldrich), puromycin (2.5 µg/mL) (Bishop), and G418 (700 µg/mL) (Bishop). Lentiviruses expressing Munc18-1 and Munc18-2 (WT or mutants) with various tags were infected to the DKD PC12 cells and isolated by applying blasticidin (5 µg/mL) (Invivogen). WT RBL-2H3 cells were purchased from ATCC and maintained in DMEM containing 10% calf serum (HyClone Laboratories), penicillin (100 U/mL)/streptomycin (0.1 mg/mL), and 250 ng/mL amphotericin B. Lentiviruses expressing shRNA against Munc18-1 and Munc18-2 were applied to RBL-2H3 cells with polybrene (8 µg/mL) (Sigma Aldrich), and infected cells were isolated by puromycin (10 µg/mL) for Munc18-1 and G418 (700 µg/mL) for Munc18-2. After successful down-regulation was confirmed, lentiviruses expressing EmGFP-tagged rat Munc18-1 or rat Munc18-2 WT and hydrophobic pocket mutants were infected to the Munc18-1/2 DKD RBL-2H3 cells and selected with blasticidin (20 µg/mL).

**β-Hexosaminidase Release Assays from RBL-2H3 cells.** RBL-2H3 cells were plated in 24-well plates; 2–3 d after plating, the cells that were to be stimulated by the IgE-dependent method were sensitized with 0.01 µg/mL dinitrophenyl (DNP)-IgE *Spe7* antibody

(Sigma Aldrich) overnight. Medium was changed for cells that were to be stimulated by ionomycin dependent method. The next day, the cells were washed twice with physiological saline solution (PSS) containing 145 mM NaCl, 5.6 mM KCl, 2.2 mM CaCl<sub>2</sub>, 0.5 mM MgCl<sub>2</sub>, 5.6 mM glucose, 15 mM Hepes, and 0.1% BSA at pH 7.4. Degranulation was stimulated by adding 500 µL PSS plus the following to the respective cells: 50 ng/mL DNP-human serum albumin (HSA) (Sigma-Aldrich), 0.5 µM ionomycin (Sigma-Aldrich), or 2.5 µM ionomycin. After 1 h of incubation at 37°C, samples were collected and centrifuged at 4°C for 3 min. Supernatant was transferred to a new set of tubes for measuring the released β-hexosaminidase. Cells were solubilized in 500 µL 0.5% Triton X-100, and samples were collected for measuring the remaining β-hexosaminidase. Then, 200 µL 1 mM p-nitrophenyl *N*-acetyl-β-D-glucosaminide (Sigma-Aldrich) was added and incubated at 37°C for 1 h. The reaction was quenched by adding 500 µL 0.05 M sodium carbonate buffer, and absorbance at 405 nm was measured by spectrophotometer. The optical density (OD)<sub>405</sub> of supernatant/OD<sub>405</sub> of total × 100% was calculated to be the percentage of β-hexosaminidase release.

**[<sup>3</sup>H]-Noradrenaline Release Assays from PC12 cells.** PC12 cells were plated in 24-well plates. Three to 4 d after plating, the cells were labeled with 0.5 µCi [<sup>3</sup>H]-Noradrenaline (NA) in the presence of 0.5 mM ascorbic acid for 12–16 h. The labeled PC12 cells were incubated with the fresh complete DMEM for 1–5 h to remove unincorporated [<sup>3</sup>H] NA. The cells were washed once with PSS, and NA secretion was stimulated with 200 µL PSS or high K<sup>+</sup>-PSS (containing 81 mM NaCl and 70 mM KCl). Secretion was terminated after a 15-min (high K<sup>+</sup>) incubation at 37°C by chilling to 0°C, and samples were centrifuged at 4°C for 3 min. Supernatants were removed and the pellets were solubilized in 0.1% Triton X-100 for liquid scintillation counting.

**Protein Interaction Experiments Between Recombinant Syntaxin-11 and Munc18-2.** Mouse syntaxin-11 cDNA was subcloned into pGex-KG, using EcoRI/XbaI sites. pGex-KG-syntaxin-11 along with empty vector, were transformed into BL21 (Codon+) cells, and the bacteria were grown at 37°C until confluent. Recombinant protein expression was induced by adding 50 µM isopropyl-β-D-thiogalactopyranoside at 30°C for 3 h. Cells were lysed using 0.1% Triton X-100 and sonications in PBS containing 1 mM EDTA and protease inhibitors (10 µg/mL leupeptin and 10 µg/mL aprotinin). Supernatant portions were then mixed with glutathione agarose beads (Pierce Biotechnology). The next day, the mixtures were washed extensively with PBS containing 20% sucrose, PBS containing 0.1% Triton X-100, and PBS, in that order. Samples were saved for binding with Munc18-2.

EmGFP, WT Munc18-2-EmGFP, and hydrophobic pocket mutants were transfected into HEK-293FT cells. After 3 d, the cells were lysed with potassium glutamate buffer containing 20 mM Hepes at pH 7.2, 120 mM K<sub>2</sub>Glu, 20 mM potassium acetate, 2 mM EGTA, and 0.1% Triton X-100 as a detergent. After centrifugation, K<sub>2</sub>Glu buffer plus detergent containing solubilized lysates were mixed with either 10 µg GST or GST-syntaxin-11. The next day, the mixtures were washed extensively with K<sub>2</sub>Glu buffer containing 0.1% Triton X-100. The samples were then dried and 2× SDS/PAGE sample buffer was added and boiled. The supernatant was subjected to SDS/PAGE followed by Coomassie Blue staining and immunoblots with mouse monoclonal anti-EmGFP antibody.





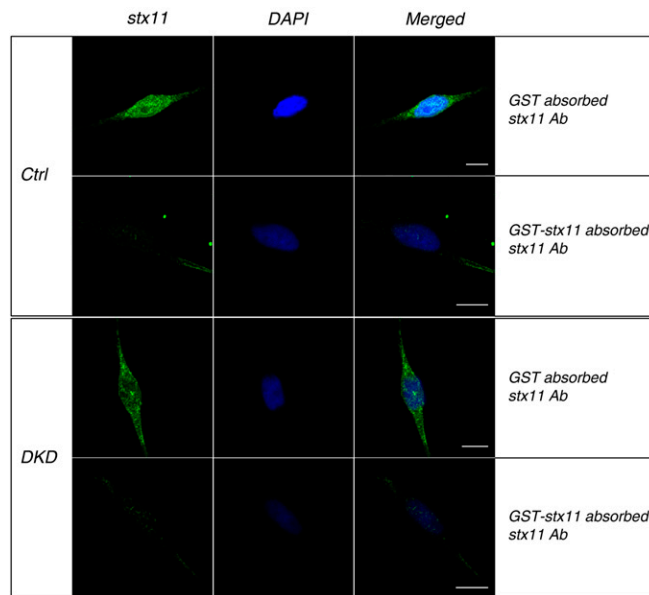

**Fig. 52.** Confocal immunofluorescent microscopy images ensuring specificity of the antibody as well as unaffected subcellular localization of syntaxin-11 on Munc18-1/2 double knockdown. Control and stable Munc18-1/2 double knockdown RBL-2H3 were permeabilized and stained with either GST or GST-syntaxin-11 absorbed anti-syntaxin-11 antibody followed by Alexa488-conjugated goat anti-rabbit antibody and DAPI. *Left*, syntaxin-11 staining; *Center*, DAPI; *Right*, merged pictures. (Scale bar, 10  $\mu$ m.)

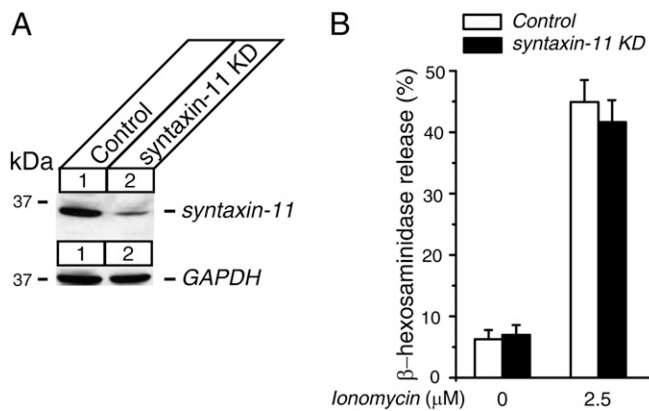

**Fig. 53.** Strong and stable knockdown of syntaxin-11 in RBL-2H3 cells does not show defects in  $\beta$ -hexosaminidase release. (A) Stable syntaxin-11 knockdown RBL-2H3 cells were generated by lentivirus-mediated shRNA. Twenty micrograms of cell homogenates were analyzed by SDS/PAGE and immunoblotting, using the antibodies indicated. The signals were detected with enhanced chemiluminescence detection system. The numbers on the left indicate the position of a molecular weight marker. (B)  $\beta$ -hexosaminidase release was stimulated by applying 2.5  $\mu$ M ionomycin for 1 h from control, as well as syntaxin-11 knockdown cells. Error bars, SEM ( $n = 6$ ).
